# Supplementary material for: Electromyography of Extrinsic and Intrinsic Ear Muscles in Healthy Probands and Patients with Unilateral Postparalytic Facial Synkinesis
Source: MDPI journal article supplement (doi:10.3390/diagnostics12010121), 2022-01-05
Supplement: s1 [file s1]

# Supplementary Materials

**Supplementary Table S1:** Needle single-channel EMG activity\* in the different ear muscles during mimic tasks on right and left side in one healthy probands.

| Muscle                | Smiling |      | Pursing Lips |      | Nose Wrinkling |      | Frowning |      | Drawing Eyes Brows |      | Ipsilateral Gaze |      | Contralateral Gaze |      | Ear Wiggling |      |
|-----------------------|---------|------|--------------|------|----------------|------|----------|------|--------------------|------|------------------|------|--------------------|------|--------------|------|
|                       | Right   | Left | Right        | Left | Right          | Left | Right    | Left | Right              | Left | Right            | Left | Right              | Left | Right        | Left |
| Auricularis anterior  | 3       | 0    | 0            | 0    | 0              | 0    | 1        | 1    | 0                  | 0    | 0                | 0    | 0                  | 0    | 2            | 3    |
| Auricularis superior  | 3       | 3    | 0            | 0    | 2              | 0    | 2        | 3    | 0                  | 0    | 0                | 0    | 0                  | 0    | 3            | 3    |
| Auricularis posterior | 2       | 0    | 1            | 0    | 0              | 0    | 3        | 3    | 0                  | 0    | 1                | 0    | 0                  | 0    | 3            | 3    |
| Tragicus              | 2       | 2    | 0            | 3    | 0              | 0    | 0        | 0    | 3                  | 0    | 0                | 0    | 0                  | 0    | 1            | 2    |
| Antitragicus          | 3       | 2    | 0            | 0    | 0              | 0    | 0        | 2    | 2                  | 0    | 0                | 0    | 0                  | 0    | 2            | 3    |
| Helicis major         | 3       | 3    | 0            | 0    | 0              | 0    | 0        | 0    | 0                  | 3    | 0                | 0    | 0                  | 0    | 2            | 2    |
| Helicis minor         | 2       | 2    | 0            | 0    | 0              | 0    | 0        | 0    | 0                  | 0    | 0                | 0    | 0                  | 0    | 2            | 2    |
| Transversus auriculæ  | X       | 0    | X            | 2    | X              | X    | X        | 0    | X                  | 0    | X                | 3    | X                  | 3    | X            | 2    |
| Obliquus auriculæ     | 2       | X    | 0            | X    | 0              | X    | 0        | X    | 0                  | X    | 0                | X    | 0                  | X    | 1            | X    |

\*EMG classification: 0 = no increase compared to baseline activity in resting state, 1 = slight increase, 2 = moderate increase, 3 = strong increase; X = not analyzable. No means ± standard deviation are reported as only one proband was examined.

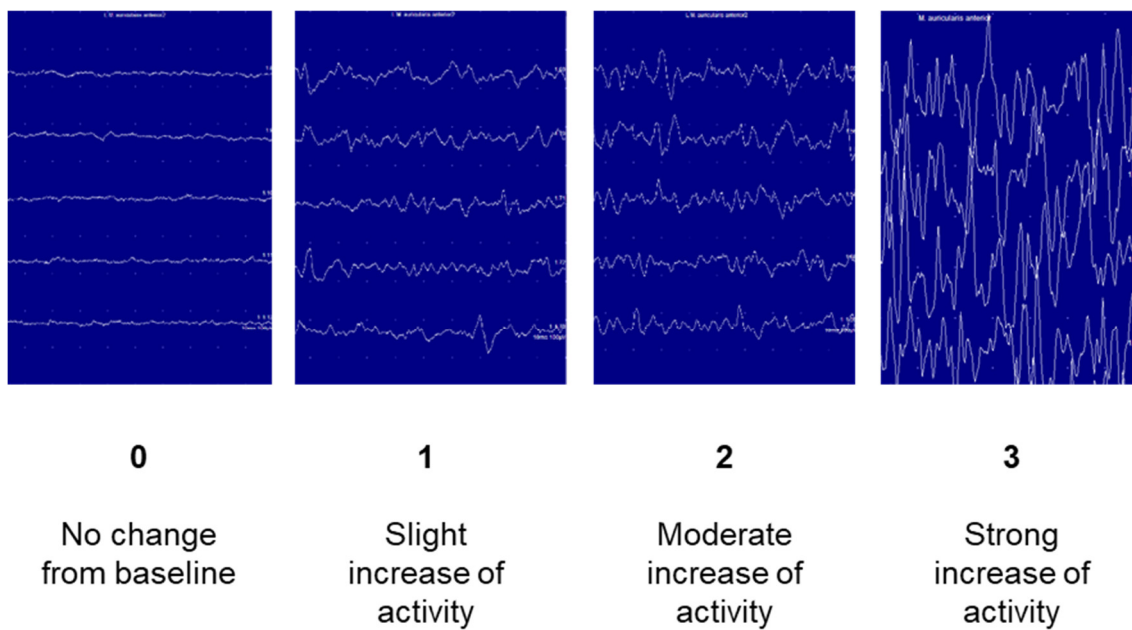

**Supplementary Figure S1.** Classification system for the EMG activity during the mimic tasks.

### One-channel electromyography setting

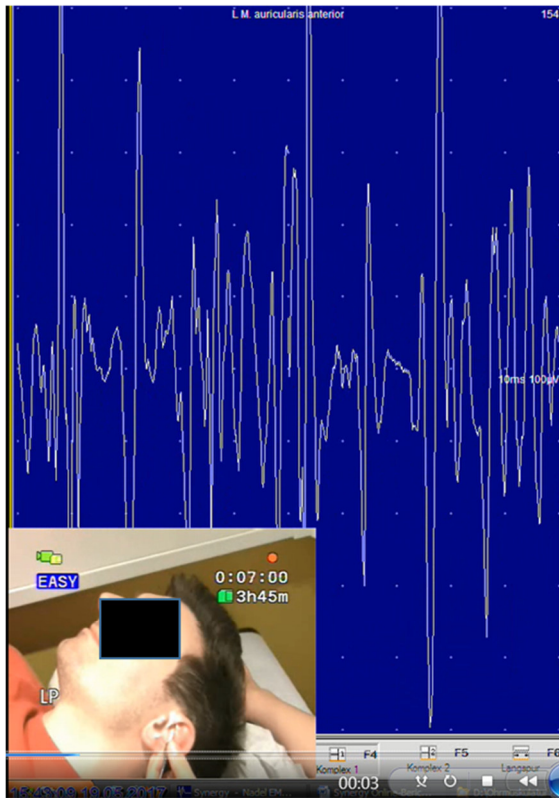

### Multi-channel electromyography setting

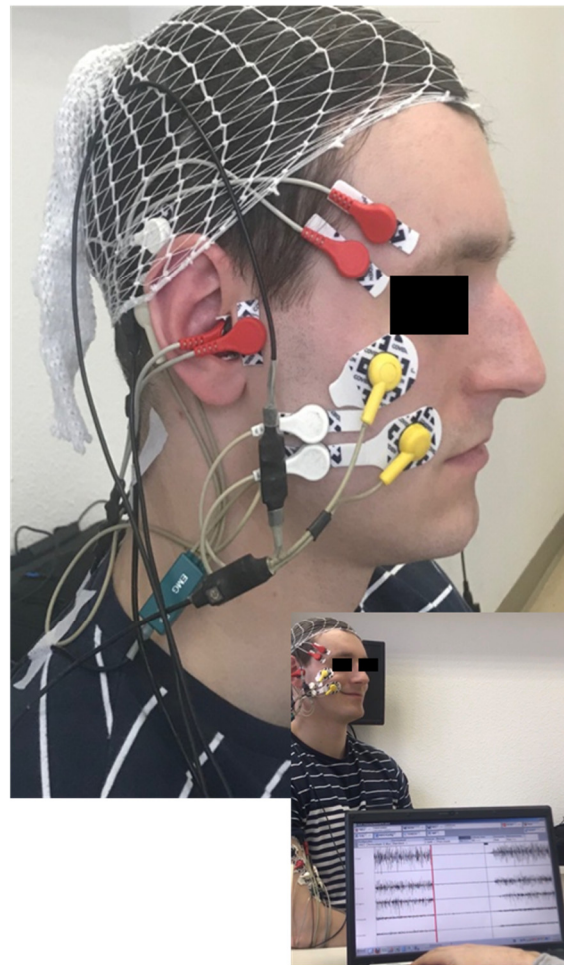

**Supplementary Figure S2.** Example for the setting of the single-channel EMG recording with a patient in supine position on the left side and for multi-channel surface EMG recordings on the right side.

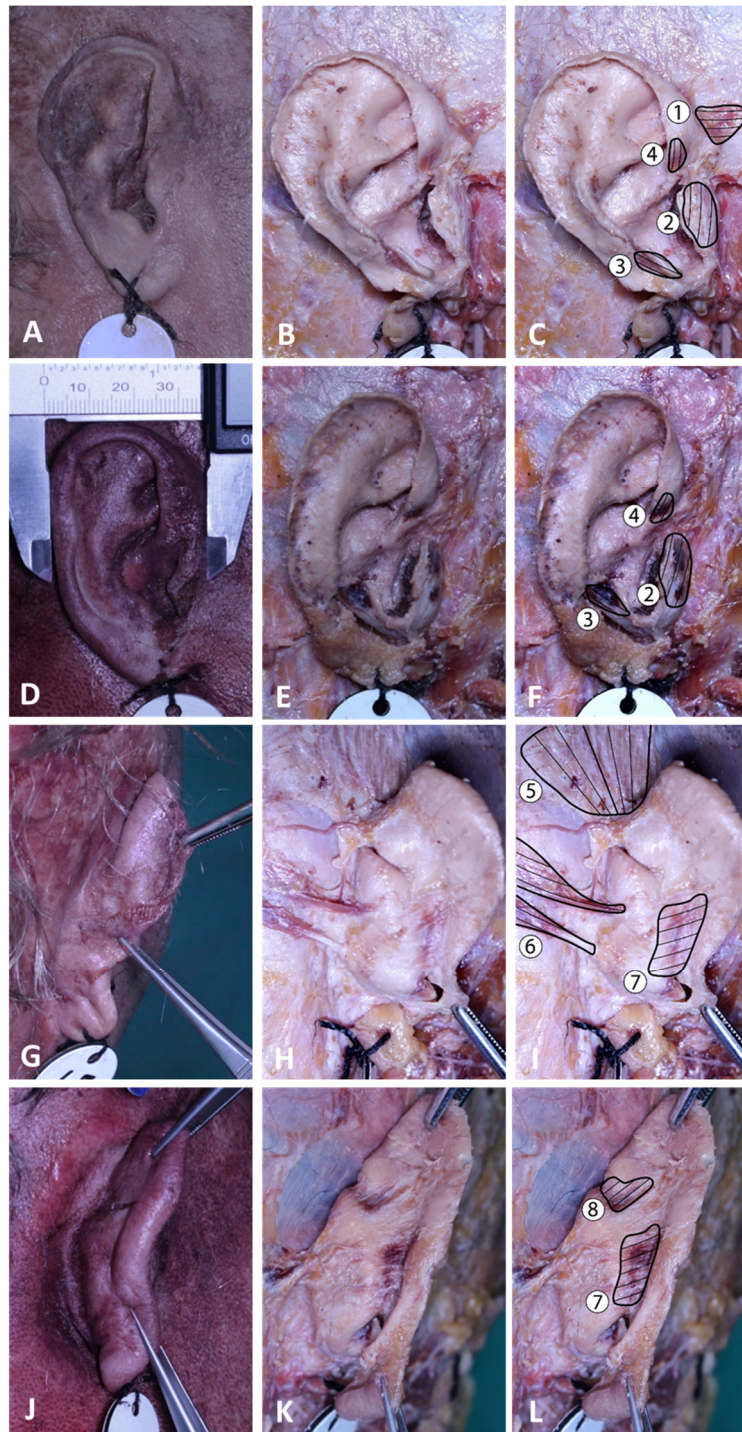

**Supplementary Figure S3.** Cadaver preparations of the ear muscles. (A–C), (G–I): dissection no. 1; (D–F), (J–L): dissection no. 2. (A–F): anterior side of both dissections; (G–L): posterior side of both dissections. A/D/G/J: before dissection; B/E/H/K: after dissection; C/F/I/L: dissected muscles delineated. 1 = M. auricularis anterior, 2 = M. tragus, 3 = M. antitragicus, 4 = M. helicis major, 5 = M. auricularis superior, 6 = M. auricularis posterior, 7 = M. transversus auriculae, 8 = M. obliquus auriculae.



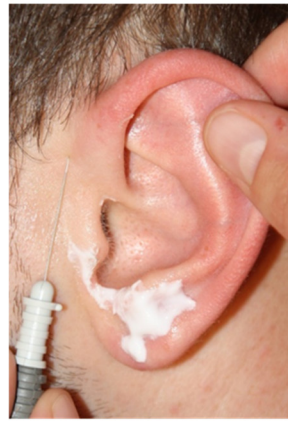

M. auricularis anterior

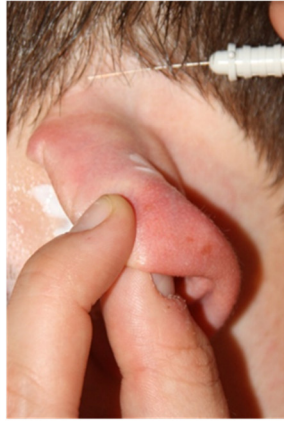

M. auricularis superior

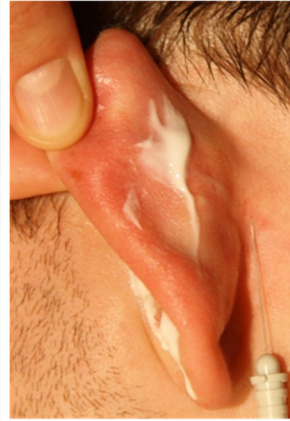

M. auricularis posterior

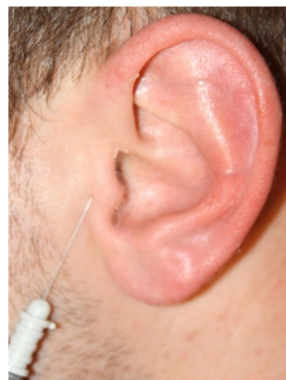

M. tragus

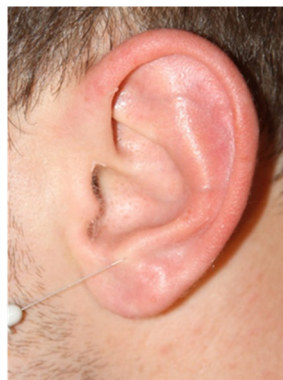

M. antitragicus

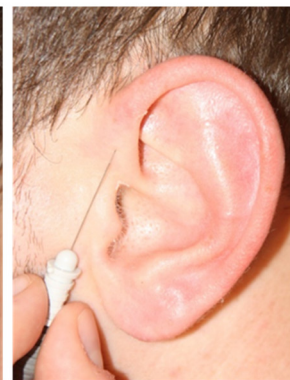

M. helicis major

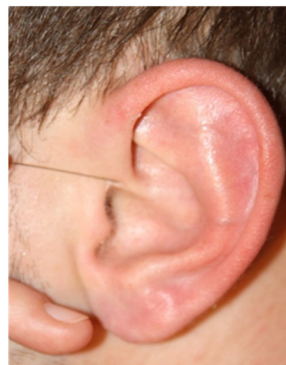

M. helicis minor

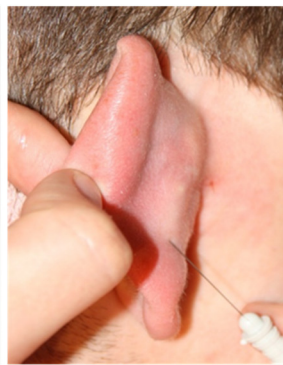

M. transversus auriculae

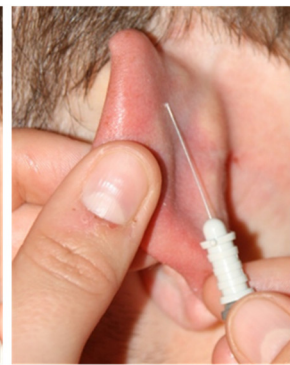

M. obliquus auriculae

**Supplementary Figure S4.** Hot spots for needle EMG for each individual ear muscle shown on the left ear.
